# Supplementary material for: Enhanced photocatalytic properties of ZnFe2O4-doped ZnIn2S4 heterostructure under visible light irradiation
Source: Royal Society of Chemistry journal article supplement (doi:10.1039/c6ra14847f), 2016-01-01
Supplement: c6ra14847f1.pdf [file c6ra14847f1.pdf]

## supporting information

### Enhanced Photocatalytic Properties of ZnFe<sub>2</sub>O<sub>4</sub> doped ZnIn<sub>2</sub>S<sub>4</sub> Heterostructure under Visible Light Irradiation

Wu Yang<sup>a</sup>, Dezhi Chen<sup>\*a</sup>, Hongying Quan<sup>b</sup>, Shaolin Wu<sup>\*a</sup>, Xubiao Luo<sup>a</sup>, Lin Guo<sup>a,c</sup>

<sup>a</sup> Key Laboratory of Jiangxi Province for Persistent Pollutants Control and Resources Recycle, School of Environmental and Chemical Engineering, Nanchang Hangkong University, Nanchang 330063, China.  
E-mail: chenzd@nchu.edu.cn, 39008@nchu.edu.cn

<sup>b</sup> School of Materials Science and Engineering, Nanchang Hangkong University, Nanchang, China.

<sup>c</sup> Key Laboratory of Bio-Inspired Smart Interfacial Science and Technology of Ministry of Education, School of Chemistry and Environment, Beihang University, Beijing 100191, China.

**Table S1.** The detail of nitrogen adsorption/desorption measurements for bare ZnIn<sub>2</sub>S<sub>4</sub>, ZnFe<sub>2</sub>O<sub>4</sub> and the ZFO-ZIS composites

| Sample                                | S <sub>BET</sub> /(m <sup>2</sup> /g) | Average pore size/(nm) | Pore volume/(cm <sup>3</sup> /g) |
|---------------------------------------|---------------------------------------|------------------------|----------------------------------|
| Pure ZnIn <sub>2</sub> S <sub>4</sub> | 77.5668                               | 5.96610                | 0.115693                         |
| Pure ZnFe <sub>2</sub> O <sub>4</sub> | 138.9283                              | 15.24611               | 0.529529                         |
| 1 wt% ZFO-ZIS                         | 170.8030                              | 5.99078                | 0.255811                         |
| 2.5 wt% ZFO-ZIS                       | 167.8726                              | 5.55760                | 0.233242                         |
| 5 wt% ZFO-ZIS                         | 104.1173                              | 6.28131                | 0.163498                         |
| 10 wt% ZFO-ZIS                        | 75.8783                               | 7.53702                | 0.142974                         |
| 30 wt% ZFO-ZIS                        | 65.8286                               | 8.7084                 | 0.143315                         |
| 50 wt% ZFO-ZIS                        | 132.1181                              | 8.23138                | 0.271879                         |

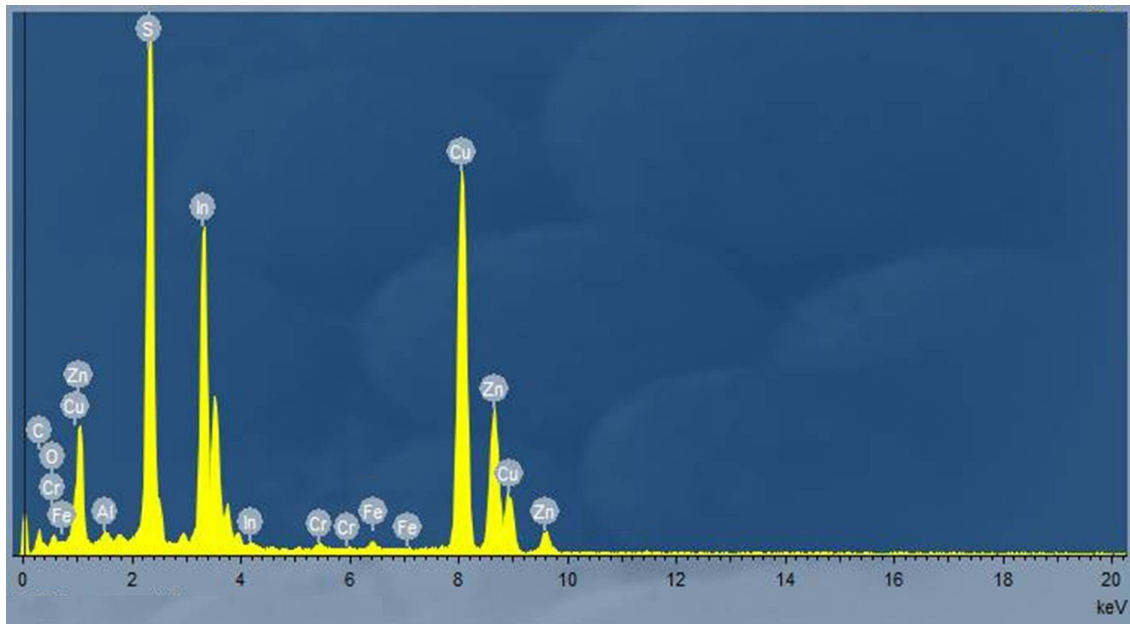

**Figure S1.** EDS spectrum of 2.5wt% ZFO-ZIS composites

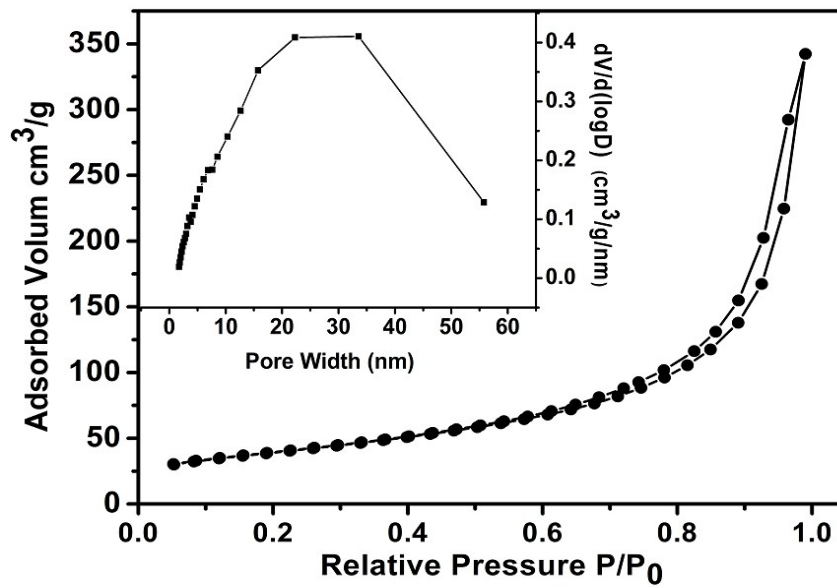

**Figure S2.**  $N_2$  adsorption–desorption isotherms of pure  $ZnFe_2O_4$  and the pore size distributions of the  $ZnFe_2O_4$  in illustrations.

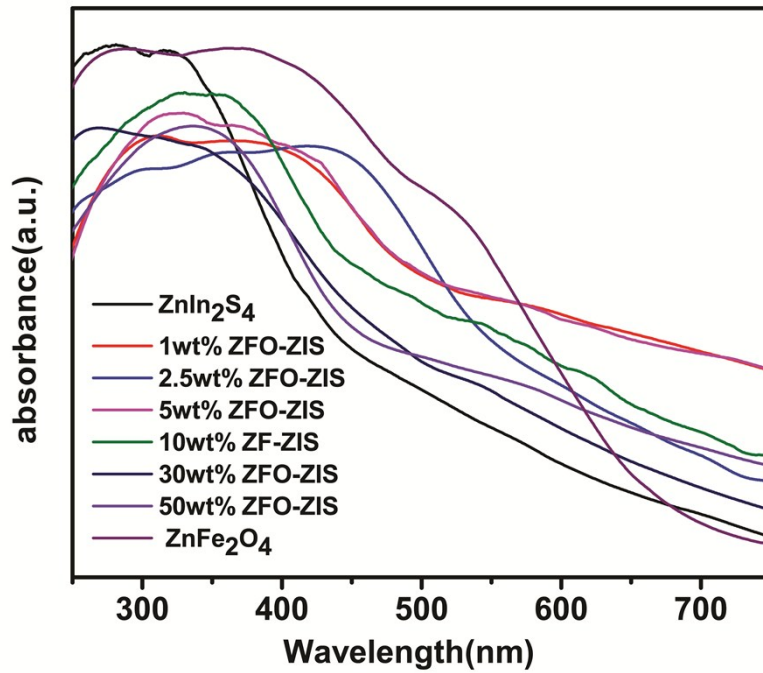

Figure S3. The UV-vis diffuse reflectance spectra of the ZnIn<sub>2</sub>S<sub>4</sub>, ZnFe<sub>2</sub>O<sub>4</sub> and ZFO-ZIS.

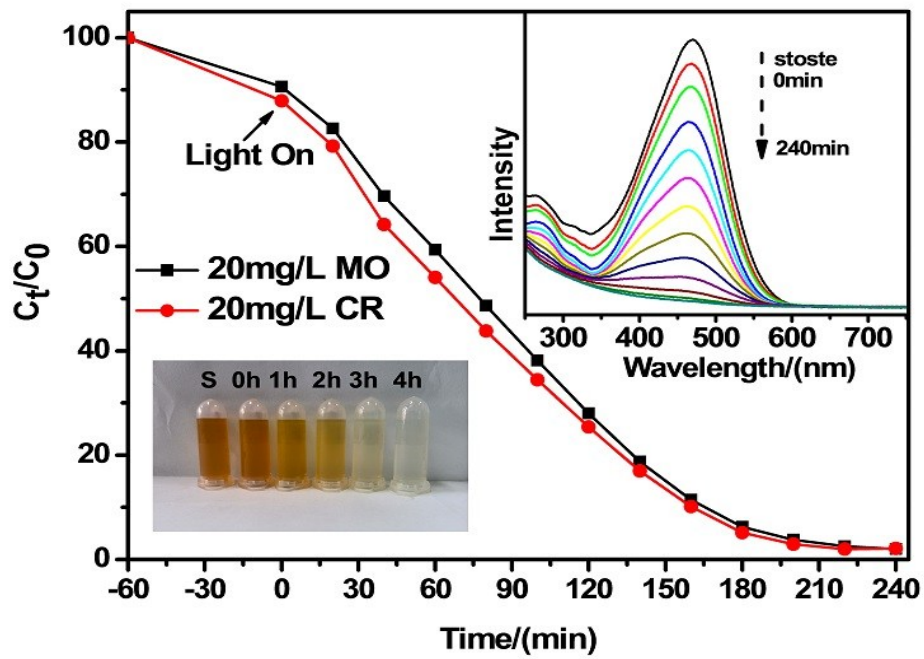

Figure S4. Decolorization of wastewater containing 20 mg/L methyl orange and 20 mg/L Congo red using the 2.5wt% ZFO-ZIS.
